# Supplementary material
Source: PubMed Central journal article supplement (PMC8369876)
Supplement: 10072_2021_5562_MOESM1_ESM.pdf [file 10072_2021_5562_MOESM1_ESM.pdf]

| City           | Year     |            |          |            |           |            |           |            |          |            |           |            |           |            |           |            |           |            | Fatality  |            |           |               |             |           |               |             |     |
|----------------|----------|------------|----------|------------|-----------|------------|-----------|------------|----------|------------|-----------|------------|-----------|------------|-----------|------------|-----------|------------|-----------|------------|-----------|---------------|-------------|-----------|---------------|-------------|-----|
|                | 2009     |            | 2010     |            | 2011      |            | 2012      |            | 2013     |            | 2014      |            | 2015      |            | 2016      |            | 2017      |            | 2018      |            | 2009-2018 |               | N           | %         | CFR           |             |     |
|                | N        | IR         | N        | IR         | N         | IR         | N         | IR         | N        | IR         | N         | IR         | N         | IR         | N         | IR         | N         | IR         | N         | IR         | N         | MIR           |             |           |               | %           | CFR |
| Amlash         | -        | -          | -        | -          | -         | -          | 1         | 2.2        | -        | -          | 1         | 2.2        | -         | -          | -         | -          | -         | -          | -         | -          | 2         | 1.15%         | 0.46        | 1         | 5.56%         | 0.50        |     |
| Astane         | -        | -          | 2        | 1.9        | -         | -          | -         | -          | -        | 1          | 0.9       | 1          | 0.9       | 1          | 0.9       | 2          | 1.8       | -          | -         | -          | 6         | 3.45%         | 0.56        | -         | -             | -           |     |
| Astara         | -        | -          | -        | -          | -         | -          | -         | -          | -        | -          | -         | 1          | 1.1       | 1          | 1.1       | 1          | 1.1       | -          | -         | -          | 2         | 1.15%         | 0.22        | 1         | 5.56%         | 0.50        |     |
| Bandar- Anzali | -        | -          | -        | -          | -         | -          | -         | -          | 1        | 0.7        | 1         | 0.7        | -         | -          | 1         | 0.7        | 1         | 0.7        | 1         | 0.7        | 5         | 2.87%         | 0.36        | 1         | 5.56%         | 0.20        |     |
| Fooman         | -        | 2          | 2.1      | 3          | 3.2       | -          | -         | -          | -        | 1          | 1.0       | -          | -         | 1          | 1.0       | -          | -         | -          | -         | -          | 7         | 4.02%         | 0.75        | 1         | 5.56%         | 0.14        |     |
| Lahijan        | -        | -          | -        | -          | -         | 1          | 0.5       | 2          | 1.1      | 3          | 1.7       | 3          | 1.7       | 3          | 1.7       | 5          | 2.9       | 5          | 2.9       | 1          | 0.6       | 16            | 9.20%       | 0.95      | 1             | 5.56%       | -   |
| Langerood      | -        | -          | -        | -          | -         | -          | -         | -          | 3        | 2.1        | 2         | 1.4        | 2         | 1.4        | 2         | 1.4        | 4         | 2.8        | 1         | 0.7        | 12        | 6.90%         | 0.85        | 1         | 5.56%         | -           |     |
| Masal          | -        | 1          | 1.9      | -          | -         | -          | -         | -          | -        | -          | -         | -          | -         | -          | -         | -          | -         | -          | 2         | 3.7        | 3         | 1.72%         | 0.57        | -         | -             | -           |     |
| Rasht          | 2        | 0.2        | 4        | 0.4        | 6         | 0.6        | 2         | 0.2        | 5        | 0.5        | 11        | 1.1        | 18        | 1.9        | 8         | 0.8        | 15        | 1.5        | 10        | 1.0        | 81        | 46.55%        | 0.86        | 10        | 55.56%        | 0.12        |     |
| Rezvanshahr    | -        | -          | -        | -          | -         | -          | -         | -          | -        | -          | -         | -          | 1         | 1.4        | 1         | 1.4        | 1         | 1.4        | -         | -          | 3         | 1.72%         | 0.43        | -         | -             | -           |     |
| Roodbar        | -        | -          | -        | -          | -         | -          | 3         | 3.0        | -        | 2          | 2.0       | -          | -         | -          | 1         | 1.0        | -         | -          | -         | -          | 6         | 3.45%         | 0.61        | 1         | 5.56%         | 0.17        |     |
| Roodsar        | -        | 2          | 1.3      | 1          | 0.6       | 2          | 1.3       | 1          | 0.6      | 1          | 0.6       | -          | -         | 1          | 0.6       | 1          | 0.6       | -          | -         | 9          | 5.17%     | 0.62          | -           | -         | -             |             |     |
| Shaft          | 1        | 1.6        | -        | -          | -         | -          | -         | -          | -        | -          | -         | -          | -         | -          | -         | -          | -         | -          | -         | -          | 1         | 0.57%         | 0.17        | -         | -             | -           |     |
| Siahkal        | -        | -          | -        | 1          | 2.1       | -          | -         | -          | -        | -          | -         | 1          | 2.1       | -          | -         | -          | 1         | 2.1        | -         | -          | 3         | 1.72%         | 0.64        | 1         | 5.56%         | 0.33        |     |
| soomehsara     | 1        | 0.7        | -        | -          | -         | -          | 1         | 0.7        | -        | 3          | 2.3       | -          | -         | -          | -         | -          | 1         | 0.8        | 3         | 2.4        | 9         | 5.17%         | 0.72        | -         | -             | -           |     |
| Talesh         | 1        | 0.5        | -        | 1          | 0.5       | -          | -         | -          | -        | 1          | 0.5       | 2          | 1.0       | -          | -         | -          | 2         | 0.9        | 2         | 0.9        | 9         | 5.17%         | 0.45        | -         | -             | -           |     |
| <b>Total</b>   | <b>5</b> | <b>0.2</b> | <b>9</b> | <b>0.3</b> | <b>14</b> | <b>0.5</b> | <b>10</b> | <b>0.4</b> | <b>8</b> | <b>0.3</b> | <b>26</b> | <b>1.0</b> | <b>29</b> | <b>1.1</b> | <b>21</b> | <b>0.8</b> | <b>32</b> | <b>1.2</b> | <b>20</b> | <b>0.7</b> | <b>17</b> | <b>100.00</b> | <b>0.69</b> | <b>18</b> | <b>100.00</b> | <b>0.10</b> |     |

IR=Incidence Rate, CFR =Case Fatality Rate, MIR=Mean, Incidence Rate,  
N=Number,

**Table S1.** The frequency of affected and death cases of GBS, incidence rate, and mortality rate based on the year and the city they affected
